# 1 **KnetMiner: a comprehensive approach for supporting evidence-based gene** 2 **discovery and complex trait analysis across species**

3

4 Keywan Hassani-Pak<sup>1\*</sup>, Ajit Singh<sup>1</sup>, Marco Brandizi<sup>1</sup>, Joseph Hearnshaw<sup>1</sup>, Sandeep Amberkar<sup>1</sup>,  
5 Andrew L. Phillips<sup>1</sup>, John H. Doonan<sup>2</sup> and Chris Rawlings<sup>1</sup>

6

7 <sup>1</sup> Rothamsted Research, Harpenden, AL5 2JQ, UK

8 <sup>2</sup> IBERS, Aberystwyth University, Aberystwyth, SY23 3DA, UK

9

10 \* Corresponding author: [keywan.hassani-pak@rothamsted.ac.uk](mailto:keywan.hassani-pak@rothamsted.ac.uk)

11

## 12 **ABSTRACT**

13 Generating new ideas and scientific hypotheses is often the result of extensive literature and  
14 database reviews, overlaid with scientists' own novel data and a creative process of making  
15 connections that were not made before. We have developed a comprehensive approach to guide  
16 this technically challenging data integration task and to make knowledge discovery and  
17 hypotheses generation easier for plant and crop researchers. KnetMiner can digest large volumes  
18 of scientific literature and biological research to find and visualise links between the genetic and  
19 biological properties of complex traits and diseases. Here we report the main design principles  
20 behind KnetMiner and provide use cases for mining public datasets to identify unknown links  
21 between traits such grain colour and pre-harvest sprouting in *Triticum aestivum*, as well as, an  
22 evidence-based approach to identify candidate genes under an *Arabidopsis thaliana* petal size  
23 QTL. We have developed KnetMiner knowledge graphs and applications for a range of species  
24 including plants, crops and pathogens. KnetMiner is the first open-source gene discovery platform  
25 that can leverage genome-scale knowledge graphs, generate evidence-based biological networks  
26 and be deployed for any species with a sequenced genome. KnetMiner is available at  
27 <http://knetminer.org>.

## 28 **KEYWORDS**

29 knowledge graph, interactive knowledge discovery, exploratory data mining, omics data  
30 integration, candidate gene prioritization, information visualisation, systems biology

31

## 32 **INTRODUCTION**

33 Genomics is undergoing a revolution. Unprecedented amounts of data are being generated to gain  
34 deeper insight into the complex nature of many traits and diseases (Boyle et al., 2017; Stephens et  
35 al., 2015). The growing landscape of diverse and interconnected data can often hinder scientists  
36 from translating complex and sometimes contradictory information into biological understanding  
37 and discoveries. Searching for information can quickly become complex and time-consuming,  
38 which is prone to information being overlooked and subjective biases being introduced. Even when  
39 the task of gathering information is complete, it is demanding to assemble a coherent view of how  
40 each piece of evidence might come together to “tell a story” about the biology that can explain how  
41 multiple genes might be implicated in a complex trait or disease. New tools are needed to provide  
42 scientists with a more fine-grained and connected view of the scientific literature and databases,  
43 rather than the conventional information retrieval tools currently at their disposal.

44 Scientists are not alone with these challenges. Search systems form a core part of the duties of  
45 many professions. Studies have highlighted the need for search systems that give confidence to  
46 the professional searcher and therefore trust, explainability, and accountability remain a significant  
47 challenge when developing such systems (Russell-Rose et al., 2018). The amount of time spent  
48 on a task also influences human choice about whether to continue the task (Sweis et al., 2018).  
49 When implemented well, search systems can give a head start to researchers by cutting the time  
50 and cost to review genes, traits or molecules of interest before initiating expensive experiments.  
51 Additionally, they offer a framework for the prioritization of future research, which can highlight  
52 gaps in knowledge.

53 Knowledge graphs (KG) are increasingly used to make search and information discovery more  
54 efficient (Fensel et al., 2020). KGs are contributing to various Artificial Intelligence (AI) applications

55 including link prediction, node classification, and recommendation and question answering  
56 systems (Ali et al., n.d.; Sheth et al., 2019). KGs model heterogeneous knowledge domains by  
57 integrating information into advanced unified data schemas (i.e. ontologies) and leverage that to  
58 apply formal and statistical inference methods to derive new knowledge (Ehrlinger & Wöß, 2016).  
59 Compared to more traditional data models, knowledge graphs are very flexible at integrating and  
60 searching connected heterogeneous data, where data schemas are not established a-priori (Yoon  
61 et al., 2017), and often subject to frequent changes. KGs in various forms have been widely  
62 adopted in many disciplines, ranging from social sciences to engineering, physics, computer  
63 science, design and manufacturing. Different research labs, including ourselves, are building  
64 biological KGs aimed at supporting crop improvement (Hassani-Pak et al., 2016; Xiaoxue et al.,  
65 2019), drug-target discovery (Mohamed et al., 2019), and disease-gene prioritization (Alshahrani &  
66 Hoehndorf, 2018; Messina et al., 2018).

67 The integrated, semi-structured and machine readable nature of KGs provides an ideal basis for  
68 the development of sophisticated knowledge discovery and data mining (KDD) applications  
69 (Holmes, 2014; Sacchi & Holmes, 2016). Exploratory data mining (EDM), a sub discipline of  
70 knowledge discovery, requires an extensive exploration stage, using both intelligent and intuitive  
71 techniques, before predictive modelling and confirmatory analysis can realistically and usefully be  
72 applied (De Bie, 2013; De Bie & Spyropoulou, 2013). Furthermore, it is considered important to  
73 include the end user into the “interactive” knowledge discovery process with the goal of supporting  
74 human intelligence with artificial intelligence (Holzinger & Jurisica, 2014). Several reports have  
75 described the benefits attained by leveraging the unique human cognitive capabilities we have,  
76 both within the fields of pattern recognition and higher-order reasoning, to interpret complex  
77 biological data and help extract biologically meaningful interpretations (Isenberg et al., 2013; Lee  
78 et al., 2012). Visualising biological information in a concise format and user-centred design can  
79 help achieve this (Fox & Hendler, 2011; Pavelin et al., 2012).

80 There are, however, a few important research challenges that need resolving before KDD and  
81 EDM techniques can optimally be applied to KGs. These include the formalisation of concepts  
82 such as an ‘interesting pattern’ found in a genome-scale KG, since ‘interestingness’ is subjective

83 and will depend on the user's perspective. The concept of 'explaining a specific biological story'  
84 using a minimum set of non-redundant and relevant patterns from the KG also needs to be  
85 formalised. These theoretical insights need to be turned into useful, scalable and interactive tools,  
86 suitable for use by non-experts and tested against real biological problems.

87

88 We have previously described our approaches to build genome-scale KGs (Hassani-Pak et al.,  
89 2016), to extend KGs with novel gene-phenotype relations from the literature (Hassani-Pak et al.,  
90 2010), to publish KGs as standardised and interoperable data based on FAIR principles (Brandizi  
91 et al., 2018a) and to visualise biological knowledge networks in an interactive web application  
92 (Singh et al., 2018). Our data integration approach to build KGs is based on an intelligent data  
93 model with just enough semantics to capture complex biological relationships between genes,  
94 traits, diseases and many more information types derived from curated or predicted information  
95 sources (Figure 1). In this paper, we describe the KnetMiner knowledge discovery platform  
96 (knetminer.org) for searching large genome-scale KGs and visualising interesting subgraphs of  
97 connected information about the biology of traits and diseases. KnetMiner is customizable and  
98 portable and therefore provides a cost-effective delivery platform for application to new species.  
99 We provide use-cases to demonstrate how KnetMiner has helped scientists to tell the story of  
100 complex traits and diseases in *Arabidopsis thaliana* and *Triticum aestivum* (bread wheat). The  
101 methods section describes the algorithms behind core discovery features of KnetMiner, i.e.  
102 identifying interesting subgraphs and using these to rank candidate genes.

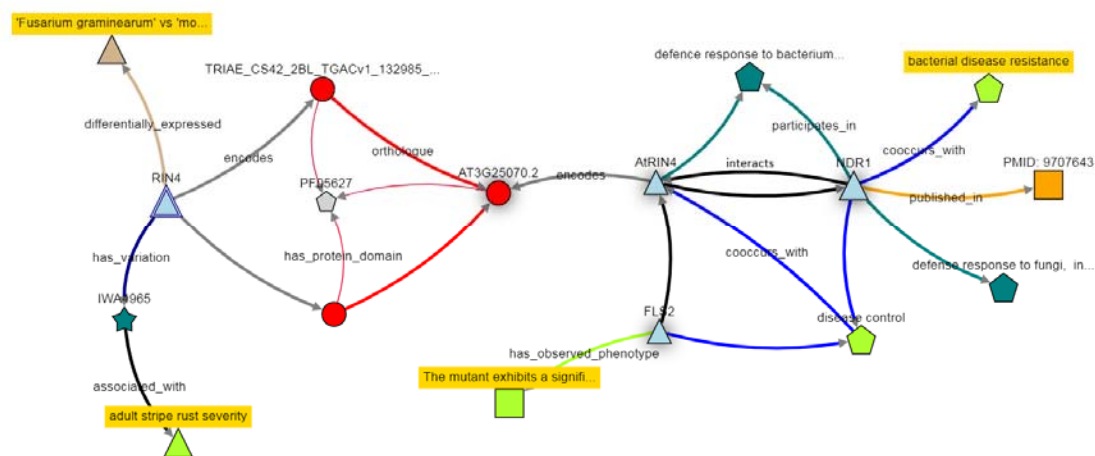

103

104 **Figure 1:** Extract of information available in the KnetMiner Knowledge Graph.

105

## 106 CASE STUDIES

107 KnetMiner can assist in various stages of a typical research and discovery project: from early  
108 stages of literature review and hypothesis generation to later stages of biological understanding  
109 and hypothesis validation. The user-centric web interfaces have been designed to provide effective  
110 user journeys for the exploration of complex connected data. A simple search interface triggers a  
111 sophisticated search process and takes the user in two steps through a rich knowledge discovery  
112 experience (Figure 2). We have selected two biological case studies that show the application of  
113 KnetMiner in gene-trait discovery and candidate gene prioritization in a model and non-model  
114 species.

115

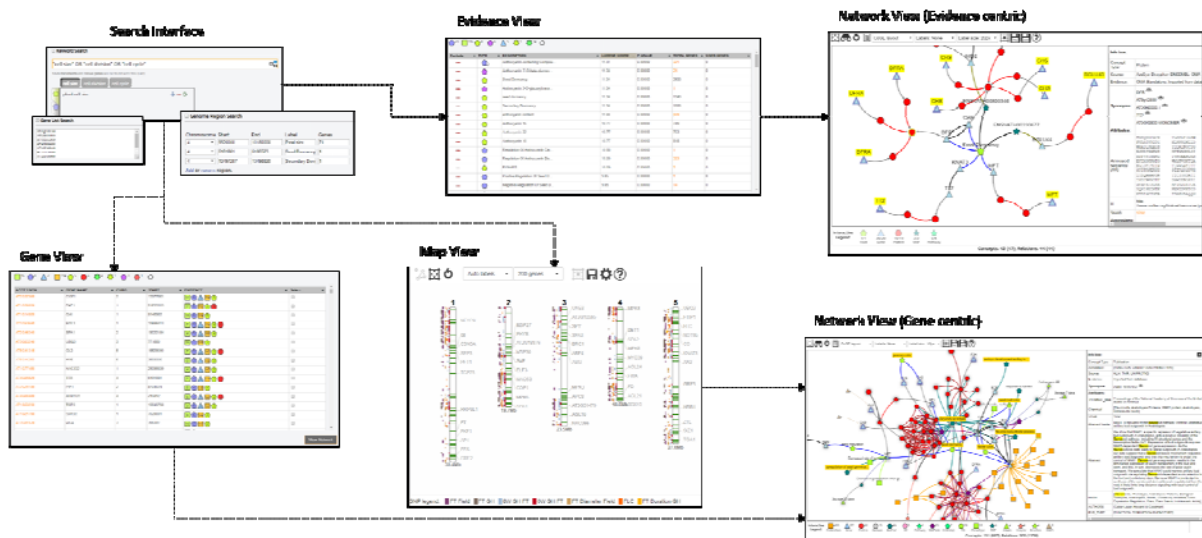

116

117 **Figure 2:** User journeys in KnetMiner. Users start with a search for keywords, genes and regions.  
118 KnetMiner provides search term suggestions and real-time query feedback. From a search, a user  
119 is presented with the following views: **Gene View** is a ranked list of candidate genes along with a  
120 summary of related evidence types. **Map View** is a chromosome based display of QTL, GWAS  
121 peaks and genes related to the search terms. **Evidence View** is a ranked list of query related  
122 evidence terms and enrichment scores along with linked genes. By selecting one or multiple  
123 elements in these three views, the user can get to the **Network View** to explore a gene-centric or  
124 evidence-centric knowledge network related to their query and the subsequent selection.

125

## 126 **Gene-trait discovery**

127 KnetMiner is being used extensively to drive gene-trait discovery research in the publicly funded  
128 Designing Future Wheat programme (<https://designingfuturewheat.org.uk/>), see for example  
129 (Adamski et al., 2020; Alabdullah et al., 2019; Harrington et al., 2019). Wheat (*Triticum aestivum*)  
130 is the third most-grown cereal crop in the world after maize and rice, and has a hexaploid 15 Gb  
131 genome which is 5 times the size of the human genome (The International Wheat Genome  
132 Sequencing Consortium (IWGSC) et al., 2018). White-grained wheat varieties lack the red  
133 compounds (flavonoids) of the seed coat and are milder in flavor. However, white grains are prone  
134 to pre-harvest sprouting (PHS) which causes the grain to germinate before harvest and results in a  
135 loss of grain quality. It has been known for some time that PHS is associated with grain colour

136 (Nilsson-Ehle, 1914) and that the red pigmentation of wheat grain is controlled by *R* genes on the  
137 long arms of chromosomes 3A, 3B, and 3D (Sears, 1944). However, after decades of research, it  
138 still remains unclear whether there is a potential link between the grain color gene *R* (*Myb*) and  
139 other phenotypes such as PHS.

140

141 We used KnetMiner to search for [TRAESCS3D02G468400](#) - the wheat *R* gene (the orthologue of  
142 Arabidopsis *TT2*) on chromosome 3D, and to explore its knowledge network generated by  
143 KnetMiner. The *TT2* network has a total of 823 connected nodes of 11 different types (see [Supp](#)  
144 [Table 1](#)) including wheat specific information sources but also cross-species information from  
145 model organisms such as Arabidopsis and rice. Similarly a range of relation types are present in  
146 the network including homologies, transcription factor target relations, protein protein interactions,  
147 phenotypic observations and correlations from mutant and genetic studies, as well as, curated or  
148 auto generated links to ontology terms and publications.

149

150 Prior to visualising the network, KnetMiner applies a graph filter for interesting subgraphs which  
151 uses the keywords that were provided as part of the search (see Methods - Graph  
152 Interestingness). In our case, since the *TT2* gene search was performed without additional  
153 keywords, a default filter is applied which hides all paths but those containing traits and  
154 phenotypes. This reduces the network from 823 nodes down to 245 nodes including 101 Trait, 48  
155 Phenotype, 72 SNP, 22 Gene and 2 Protein nodes ([Figure 3A](#)). This network is displayed in the  
156 Network View which provides interactive features to hide or add specific evidence types from the  
157 network. Nodes are displayed in a defined set of shapes, colors and sizes to distinguish different  
158 types of evidence. A shadow effect on nodes indicates that more information is available but has  
159 been hidden. The auto-generated network, however, is not yet telling a story that is specific to our  
160 traits of interest and is limited to evidence that is phenotypic in nature.

161

162 To further refine and extend the search for evidence that links *TT2* to grain color and PHS, we can  
163 provide additional keywords relevant to the traits of interest. Seed germination and dormancy are  
164 the underlying developmental processes that activate or prevent pre-harvest sprouting in many

165 grains and other seeds. The colour of the grain is known to be determined through accumulation of  
 166 proanthocyanidin, an intermediate in the flavonoid pathway, found in the seed coat. These terms  
 167 and phrases can be combined using boolean operators (AND, OR, NOT) and used in conjunction  
 168 with a list of genes. Thus, we search for [TRAESCS3D02G468400](https://doi.org/10.1101/2020.04.02.017004) (*TT2*) and the keywords: “seed  
 169 germination” OR “seed dormancy” OR color OR flavonoid OR proanthocyanidin. This time,  
 170 KnetMiner filters the extracted *TT2* knowledge network (823 nodes) down to a smaller subgraph of  
 171 68 nodes and 87 relations in which every path from *TT2* to another node corresponds to a line of  
 172 evidence to phenotype or molecular characteristics based on our keywords of interest (Figure 3B).  
 173  
 174

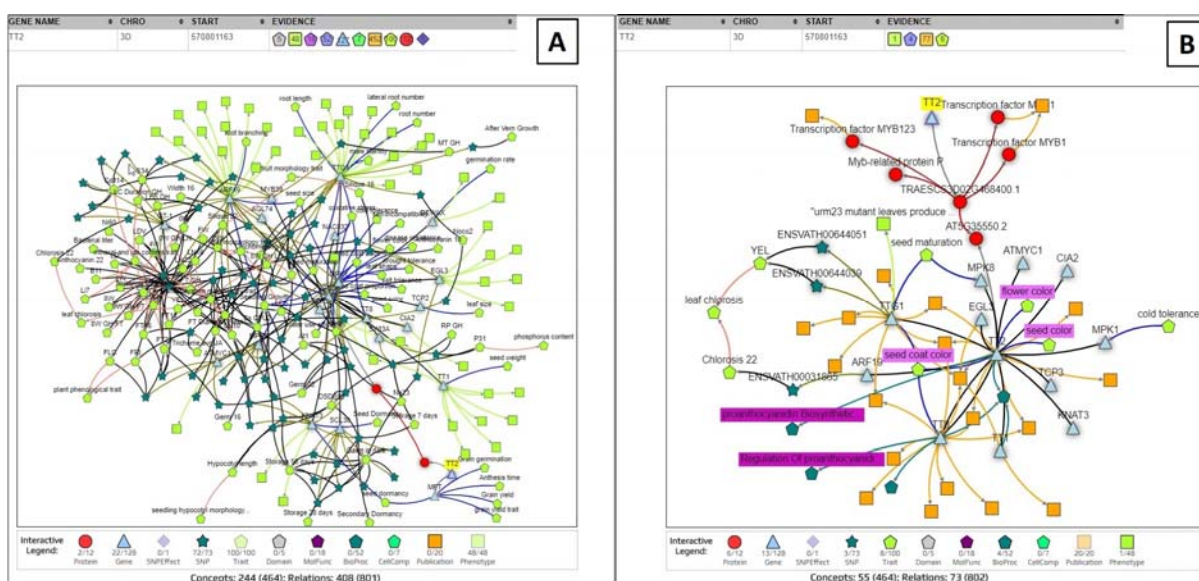

175  
 176 **Figure 3:** Gene View (top) and Network View (bottom) of KnetMiner. **(A)** Search results for *TT2*  
 177 only (without keywords). **(B)** Search results for *TT2* and keywords for PHS and grain color.  
 178  
 179 This auto-generated subgraph visualises complex information in a concise and connected format,  
 180 helping facilitate biologically meaningful conclusions between *TT2* and phenotypes such as PHS (see  
 181 [Supp Table 2](#)). The subgraph indicates that *TT2* in wheat is predicted to regulate the  
 182 transcriptional activation of *MFT*. It indicates that *MFT* has been linked in a recent publication to  
 183 grain germination and seed dormancy in wheat (Nakamura S, n.d.; Zong Y, n.d.). It also reveals  
 184 that the *MFT* ortholog in *Arabidopsis* is linked to decreased germination rate in the presence of



185 ABA (Xi et al., 2010) and positive regulation of seed germination. To investigate potential links  
186 between grain color and other phenotypes, the TT2 network can be expanded with two clicks, to  
187 add interacting genes in wheat or model species along with their phenotypic information. For  
188 example, the Arabidopsis *TT2* ortholog is shown to interact with *TTG1* which has links to  
189 phenotypes such as lateral root number and root hair length in Arabidopsis (Bahmani R, n.d.; Bipei  
190 Zhang, 2017). Root hairs are tubular outgrowths from specific epidermal cells that function in  
191 nutrient and water absorption (Larry Peterson & Farquhar, 1996).

192

193 Overall the exploratory link analysis has generated a potential link between grain color and PHS  
194 due to *TT2-MFT* interaction and suggested a new hypothesis between two traits (PHS and root  
195 hair density) that were not part of the initial investigation and previously thought to be unrelated.  
196 Furthermore, it raises the possibility that *TT2* mutants might lead to increased root hairs and to  
197 higher nutrient and water absorption, and therefore cause early germination of the grain. More data  
198 and experiments will be needed to address this hypothesis and close the knowledge gap.

199

## 200 **Candidate gene prioritisation**

201 Forward genetics studies, such as a genome-wide association study (GWAS) or quantitative trait  
202 loci (QTL) mapping, aim to identify regions in the genome where the genetic variation correlates  
203 with variation observed in a quantitative trait (e.g. general intelligence, days to flowering) (Atwell et  
204 al., 2010; Polderman et al., 2015; Sonah et al., 2015). They are based purely on statistical tests  
205 and do not take into account the biology in considering candidates. It is often difficult to elucidate  
206 which exact marker is biologically significant, particularly in the face of epistatic and epigenetic  
207 effects which are often not considered. GWAS and QTL regions can encompass many seemingly  
208 unrelated genes. Candidate gene analysis aims to identify the most likely cause for the phenotypic  
209 variation. The identification of candidate genes underlying QTL is not trivial, therefore genetic  
210 studies often stop after QTL mapping, or perform a basic search for genes with potentially  
211 interesting annotations.

212

213 For example, in a recent QTL study in Arabidopsis, a region on chromosome 4 was identified that  
 214 contained overlapping QTLs for multiple petal traits (Abraham et al., 2013). As this QTL  
 215 overlapped with the *ULTRAPETALA1 (ULT1)* locus, a known floral meristem regulator with a role  
 216 in petal development (Fletcher, 2001), the authors tested whether *ULT1* might be responsible for  
 217 this QTL. However, the authors stated that among the ecotypes used in the study none showed  
 218 any polymorphic sites within the *ULT1* coding or 2kb upstream region; and the T-DNA insertional  
 219 mutation of *ULT1* showed no significant effect on petal form either. Taken together, the evidence  
 220 suggested that *ULT1* was not responsible for the petal size QTL, and the causal gene remained  
 221 unidentified as is the case in many other GWAS and QTL studies. Therefore, to explore this  
 222 further, we analysed an overlapping petal size QTL (manuscript in preparation) using a more  
 223 sophisticated and evidence-based search to see if the authors may have missed something. The  
 224 biological processes underpinning the size of plant tissues and organs are likely to be related to  
 225 changes on a cellular level. We therefore used as inputs to KnetMiner the location of a petal size  
 226 QTL (chromosome 4, 9.92 - 10.18 Mb) and the keywords “cell size” OR “cell cycle” OR “cell  
 227 division”. KnetMiner identified 71 genes in the QTL region and ranked them according to their  
 228 relevance to the keywords (Figure 4A) (see Methods - Gene Ranking).  
 229

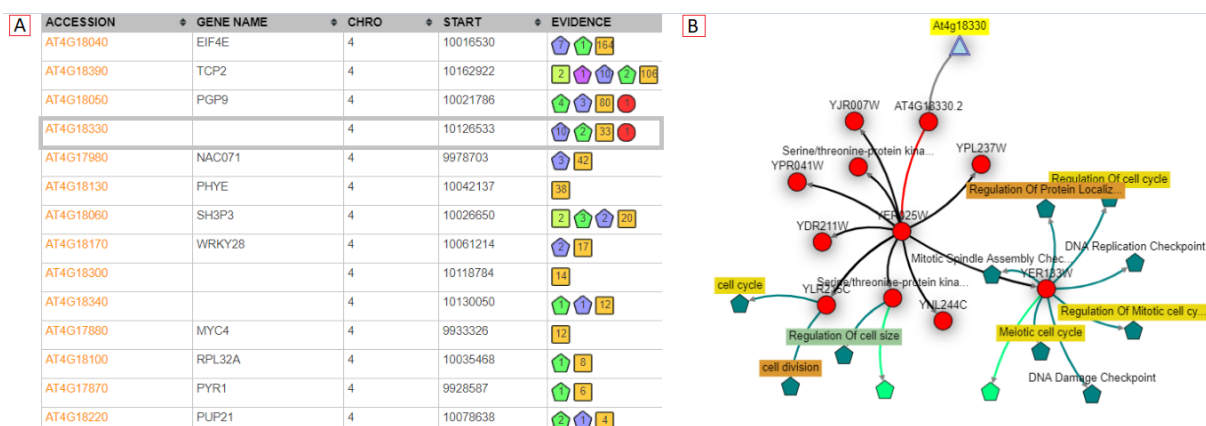

230  
 231 **Figure 4: (A)** Ranked list of genes shown in the Gene View. The Evidence column summarises the  
 232 amount of related information within and across species. AT4G18330 is linked to 10 biological  
 233 processes, 2 cellular components, 33 publications and 1 protein related to “cell size” OR “cell  
 234 cycle” OR “cell division”. All linked publications are from the yeast ortholog. **(B)** Automatically

235 generated subgraph for AT4G18330 and given keywords. The yeast ortholog YER025W interacts  
236 with several cell size, cell division and cell cycle related proteins.

237

238 The KnetMiner top 5 ranked genes included a poorly studied gene (AT4G18330) with no links to  
239 publications in Arabidopsis and a few high-level GO annotations. However, the KnetMiner  
240 subgraph for AT4G18330 indicated that the yeast ortholog YER025W (eIF-2-gamma) interacts with  
241 cell division cycle proteins such as CDC123 (Figure 4B). Although no knockouts were available for  
242 this gene, a polymorphism in the regulatory region was associated with altered cellular and petal  
243 phenotypes consistent with a role in petal size (manuscript in preparation). The ability to  
244 systematically and visually evaluate different layers of evidence arising from orthologs to  
245 interactions, is highly advantageous; it's quick to view and as such, the most relevant genes can  
246 immediately be investigated further.

247

## 248 **METHODS**

### 249 **Graph Pattern Mining**

250 We have previously described our tools and methods to build FAIR genome-scale Knowledge  
251 Graphs (KG) using the KnetBuilder and rdf2neo data integration platforms (Brandizi et al., 2018a,  
252 2018b; Hassani-Pak et al., 2016). Here we elaborate how KnetMiner uses the KG to extract  
253 biologically meaningful subgraphs that tell the story of complex traits and diseases. Biologically  
254 plausible patterns in the KG are collections of paths through the connected information that most  
255 biologists would generally agree to be informative when studying the function of a gene. Searching  
256 a KG for such patterns is akin to searching for relevant sentences containing evidence that  
257 supports a particular point of view within a book. Such evidence paths can be short e.g. Gene A  
258 was knocked out and phenotype *X* was observed; or alternatively the evidence path can be longer,  
259 e.g. Gene A in species *X* has an ortholog in species *Y*, which was shown to regulate the  
260 expression of a disease related gene (with a link to the paper). In the first example, the relationship  
261 between gene and disease is directly evident and experimentally proven, while in the second

262 example the relationship is indirect and less certain but still biologically meaningful. There are  
263 many evidence types that should be considered for evaluating the relevance of a gene to a trait. In  
264 a KG context, a gene is considered to be, for example, related to ‘early flowering’ if any of its  
265 biologically plausible graph patterns contain nodes related to ‘early flowering’. In this context, the  
266 word ‘related’ doesn’t necessarily mean that the gene in question will have an effect on ‘flowering  
267 time’, but it means that there is a valid piece of evidence that a domain expert should consider  
268 when judging if the gene is related to ‘flowering time’.

269

270 We use the notion of a **semantic motif** to define a plausible path through the KG (Biemann et al.,  
271 2016). Our semantic motifs start with a gene node and end with other nodes representing  
272 biological entities, ontology terms, publications etc. For example, a path that travels from a Gene  
273 node to a GO-term, through an ortholog relation, is biologically plausible (orthologs have often the  
274 same function), while travelling through a paralog relation is not (paralogs often adapt new  
275 functions). KnetMiner instances can have a bespoke set of semantic motifs reflecting the data  
276 model of the KG built for a particular species or domain of interest. We are working towards  
277 migrating KnetMiner to support the Cypher graph query language and the Neo4j graph database  
278 as a practical and expressive way to define the graph searches that capture the semantic motifs of  
279 interest. **Supp Table 3** contains example Cypher queries used in the public wheat KnetMiner along  
280 with summary statistics for each query. The KnetMiner gene search and subgraph generation are  
281 essentially based on these well-defined graph queries. Not every gene will necessarily match all  
282 semantic motifs, however, the ones it contains are extracted and their union is taken to produce a  
283 gene-centric subgraph (GCS). For example, the wheat KG has over 114,000 GCSs (one for each  
284 wheat gene) with sizes of min=1, max=6220 and mean=181 nodes.

285

286 Nodes that are included in a GCS are presumed to be transferable to the gene of interest, in  
287 contrast, concepts that are excluded from a GCS (although still part of the KG) are presumed to be  
288 irrelevant to the gene in question. Notably, if a semantic motif fails to capture an important  
289 biological motif, then downstream knowledge mining applications won’t be able to exploit this  
290 information.

## 291 **Graph Interestingness**

292 Even a single GCS with hundreds of nodes can be complex and challenging to comprehend when  
293 shown to a user; let alone if combining GCSs for tens to hundreds of genes. There is therefore a  
294 need to filter and visualise the subset of information in the GCSs that is most interesting to a  
295 specific user. However, the interestingness of information is subjective and will depend on the  
296 biological question or the hypothesis that needs to be tested. A scientist with an interest in disease  
297 biology is likely to be interested in links to publications, pathways, and annotations related to  
298 diseases, while someone studying the biological process of grain filling is likely more interested in  
299 links to physiological or anatomical traits. To reduce information overload and visualise the most  
300 interesting pieces of information, we have devised two strategies. 1) In the case of a combined  
301 gene and keyword search, we use the keywords as a filter to show only paths in the GCS that  
302 connect genes with keyword related nodes, i.e. nodes that contain the given keywords in one of  
303 their node properties. In the special case where too many publications remain even after keyword  
304 filtering, we select the most recent N publications (default N=20). Nodes not matching the keyword  
305 are hidden but not removed from the GCS. 2) In the case of a simple gene query (without  
306 additional keywords), we initially show all paths between the gene and nodes of type  
307 phenotype/trait, i.e. any semantic motif that ends with a trait/phenotype, as this is considered the  
308 most important relationship to many KnetMiner users.

## 309 **Gene Ranking**

310 We have developed a simple and fast algorithm to rank genes and their GCS for their importance.  
311 We give every node in the KG a weight composed of three components, referred to as SDR,  
312 standing for the **S**pecificity to the gene, **D**istance to the gene and **R**elevance to the search terms.  
313 **Specificity** reflects how specific a node is to a gene in question. For example, a publication that is  
314 cited (linked) by hundreds of genes receives a smaller weight than a publication which is linked to  
315 one or two genes only. We define the specificity of a node  $x$  as:  $S(x) = \log \frac{N}{n}$  where  $n$  is the  
316 frequency of the node occurring in all N GCS. **Distance** assumes information which is associated  
317 more closely to a gene can generally be considered more certain, versus one that's further away,  
318 e.g. inferred through homology and other interactions increases the uncertainty of annotation

319 propagation. A short semantic motif is therefore given a stronger weight, whereas a long motif  
320 receives a weaker weight. Thus, we define the second weight as the inverse shortest path distance  
321 of a gene  $g$  and a node  $x$ :  $D(g, x) = \frac{1}{|v_g \rightarrow v_x|}$ . Both weights  $S$  and  $D$  are not influenced by the  
322 search terms and can therefore be pre-computed for every node in the KG. **Relevance** reflects the  
323 relevance or importance of a node to user-provided search terms using the well-established  
324 measure of inverse document frequency (IDF) and term frequency (TF) (Salton & Yang, 1973).  
325 TF\*IDF forms the basis of the Lucene search engine library (<https://lucene.apache.org/>), used in  
326 KnetMiner. We define the relevance of node  $x$  to a search term  $t$  as  $R(t, x) = TF \times IDF(t, x)$ , where  
327  $R=0$  when no match is found and  $R=1$  when the user does not provide any keywords. The three  
328 measures ( $S$ ,  $D$ , and  $R$ ) have unique and uncorrelated characteristics. Each node in KnetMiner is  
329 given a combined SDR weight. Therefore, for a given GCS  $X_g = \{x, x_2, \dots, x_n\}$  and search terms  $t$ ,  
330 we define the *KnetScore* of a gene as:

$$KnetScore(t, X_g) = \sum_{x_i \in X_g \cap x_i \ni t} S(x_i) * D(g, x) * R(t, x_i)$$

331 The sum considers only GCS nodes that contain the search terms. In the absence of search terms,  
332 we sum over all nodes of the GCS with  $R=1$  for each node. The computation of the KnetScore  
333 (*SDR*-weights) requires graph traversals and string searches over the KG. Performing these  
334 operations on-the-fly would slow down the responsiveness of the application. Therefore at  
335 initialisation, KnetMiner pre-processes the KG and builds indices to speed up the *SDR* weight  
336 calculation. The pre-indexing time depends on a number of factors including number of available  
337 cores, the KG size, number of genes and number of semantic motifs. With the indices in place, the  
338 *SDR*-weight can be computed in constant time  $O(1)$ . A KnetMiner search that returns  $n$  genes and  
339  $m$  evidence nodes, can rank all genes in linear time  $O(n+m)$ .

340

## 341 **DISCUSSION**

342 Biological knowledge discovery is often hampered by the challenges of data integration and new  
343 approaches are needed to improve the efficiency, reproducibility, and objectivity of the process that

344 leads to new ideas and hypotheses. KnetMiner provides a sophisticated search across a  
345 semantically rich knowledge graph built from large scale integration of public and private data sets.  
346 It addresses the needs of scientists who generally lack the time and the broad expertise that is  
347 necessary to connect, explore, and compare the wealth of genetic, 'omics, and phenotypic  
348 information available in the literature and a wide range of related biological databases from key  
349 model and non-model species.

350

351 KnetMiner is commonly used by scientists in academia and industry to accelerate gene-trait  
352 discovery research. In several biological studies, KnetMiner enabled the identification of hidden  
353 relationships between important agronomic traits and potential candidate genes. The presented  
354 case studies have shown practical applications of KnetMiner to the understanding of challenging  
355 and complex traits in wheat and Arabidopsis. KnetMiner was used in 2014 to investigate traits such  
356 as height of biomass willows (Hanley & Karp, 2014) and has more recently become part of a wider  
357 roadmap for gene function characterization in crops (Adamski et al., 2020). Public KnetMiner  
358 resources (e.g. Arabidopsis, wheat, and rice) give a flavour of the capabilities that are in  
359 KnetMiner. While we have so far mostly concentrated on customising KnetMiner for plant sciences  
360 and crop improvement, the software we have developed is generic and KGs and KnetMiner can  
361 readily be built for other species. Compared to biological discovery platforms available for specific  
362 species (Carvalho-Silva et al., 2019; Miller et al., 2017; Mungall et al., 2017), KnetMiner is species-  
363 agnostic and therefore provides a more cost-effective delivery platform for application to new  
364 species. KnetMiner is available as a Docker image from DockerHub and can easily be deployed  
365 with a provided sample KG.

366

367 Different KnetMiner views for exploring the search output have been developed; each view has a  
368 different aim and helps address different questions. The main design principle was to divide the  
369 visualisation into two steps. First, to present the results in formats that are intuitive and familiar to  
370 biologists, such as tables and chromosome views, allowing them to explore the data, make  
371 choices as to which gene to view, or refine the query if needed. These initial views help users to  
372 reach a certain level of confidence with the selection of potential candidate genes. However, they

373 do not tell the biological story that links candidate genes to traits and diseases. In a second step, to  
374 enable the stories and their evidence to be investigated in full detail, the Network View visualises  
375 highly complex information in a concise and connected format, helping facilitate biologically  
376 meaningful conclusions. Consistent graphical symbols are used for representing evidence types  
377 throughout the different views, so that users develop a certain level of familiarity, before being  
378 exposed to networks with complex interactions and rich content.

379

380 The methods (graph pattern mining, graph interestingness and gene ranking) that power the  
381 KnetMiner user interface are also available as API calls and can be used to embed visualisations  
382 of gene-centric subgraphs in third party web applications or to integrate graph analytics and gene  
383 ranking in custom workflows. For example, the KnetMiner REST API is used in Ensembl Plants  
384 (Bolser et al., 2017), The Triticeae Toolbox (Blake et al., 2016) and GrainGenes (Blake et al.,  
385 2019) to link gene sequences to rich gene knowledge graphs. The graph database backend, as  
386 well as the FAIR-based data management policies, are another development in which we are  
387 investing our efforts, which have the main advantage of allowing us to build a data asset that has  
388 the potential to be useful to a wealth of applications, complementary to KnetMiner. The SPARQL  
389 and Cypher endpoints have the benefit of providing a layer of access to data that have a more  
390 general use than gene-centric knowledge exploration and which, for instance, could be obtained  
391 with scripts accessing APIs, workflow tools like Galaxy (Afgan et al., 2018), or data analytics  
392 workbenches like Jupyter (Kluyver et al., 2016). This is facilitated by adhering to the well-known  
393 good practice of the FAIR principles, which includes the adoption of common data schemas and  
394 ontologies (Garcia et al., 2017).

395

## 396 **CONCLUSION**

397 Scientists spend a considerable amount of time searching for new clues and ideas by synthesizing  
398 many different sources of information and using their expertise to generate hypotheses. KnetMiner  
399 is a user-friendly platform for biological knowledge discovery and exploratory data mining. It allows  
400 humans and machines to effectively connect the dots in life science data and literature, search the



401 connected data in an innovative way, and then return the results in an accessible, explorable, yet  
402 concise format that can be easily interrogated to generate new insights. We have developed  
403 KnetMiner knowledge graphs and applications for a range of species including plants, crops,  
404 insects, pathogens, livestock and even a Human SARS-CoV-2 knowledge graph to help  
405 investigate Covid-19. We are beginning to explore new use cases of KnetMiner to crop  
406 improvement and breeding, microbial ecology, pathogen-host interaction and other domains. We  
407 are rapidly improving the usability of the software, adding new features and extending the  
408 knowledge mining approaches. The latest version of the KnetMiner software and documentation is  
409 available at: <https://knetminer.org>

410

## 411 **DECLARATIONS**

### 412 **Availability of data and materials**

413 Project name: KnetMiner - Knowledge Network Miner

414 Project home page: <https://knetminer.org>

415 Source code: <https://github.com/Rothamsted/knetminer>

416 Docker image: <https://hub.docker.com/r/knetminer/knetminer>

417 Deployment instructions: <https://github.com/Rothamsted/knetminer/wiki/>

418 Knowledge Graph Endpoints: <http://knetminer.org/data>

419 Operating system(s): Platform independent

420 Programming language: Java and JavaScript

421 Other requirements: Docker

422 License: MIT

423 Any restrictions to use by non-academics: database licence needed

424

### 425 **Competing interests**

426 The authors declare that they have no competing interests.

427

### 428 **Funding**

429 This work was supported by the UKRI Biotechnology and Biological Sciences Research Council  
430 (BBSRC) through the Designing Future Wheat ISP (BB/P016855/1), DiseaseNetMiner TRDF  
431 (BB/N022874/1), ONDEX SABR funding (BB/F006039/1) and National Capability in Crop  
432 Phenotyping (BB/J004464/1). CR, KHP, AS are additionally supported by strategic funding to  
433 Rothamsted Research from BBSRC. JHD also acknowledges support from the National Science  
434 Foundation (cROP project 1340112).

435

#### 436 **Authors' contributions**

437 KHP designed the approach as part of his dissertation with CR, collected results, and drafted the  
438 manuscript. KHP, AS, MB, JH and the KnetMiner team implemented the KnetMiner framework and  
439 maintain its public instances. SA helped to build the Arabidopsis and wheat knowledge graphs. AP  
440 and JHD provided the biological use cases. All authors read, reviewed and approved the final  
441 manuscript.

442

#### 443 **Acknowledgements**

444 We acknowledge all the past and present members of the KnetMiner Bioinformatics team at  
445 Rothamsted for their scientific inputs, software testing and technical support: Emma Bailey, Dan  
446 Smith, Robert King, David Hughes, Monika Mistry, Minja Zorc, Fengyuan Hu, Jan Taubert, William  
447 Brown and Ricardo Gregorio. We acknowledge all our collaborators who contributed to the  
448 development of the KnetMiner resources and software in the past including Martin Castellote,  
449 Maria Esch, Vasiliki Koutra, Haolin Li, Philipp Bayer, Ramil Mauleon, Cristobal Uauy, Jean-Luc  
450 Jannink, Clay Birkett, Uwe Schulz, Steve Hanley, Francis Newson and Richard Holland.

451

## 452 **REFERENCES**

453 Abraham, M. C., Metherairut, C., & Irish, V. F. (2013). Natural variation identifies multiple loci  
454 controlling petal shape and size in *Arabidopsis thaliana*. *PLoS One*, 8(2), e56743.

455 Adamski, N. M., Borrill, P., Brinton, J., Harrington, S. A., Marchal, C., Bentley, A. R., Bovill, W. D.,  
456 Cattivelli, L., Cockram, J., Contreras-Moreira, B., Ford, B., Ghosh, S., Harwood, W., Hassani-

- 457 Pak, K., Hayta, S., Hickey, L. T., Kanyuka, K., King, J., Maccaferri, M., ... Uauy, C. (2020). A  
458 roadmap for gene functional characterisation in crops with large genomes: Lessons from  
459 polyploid wheat. *eLife*, 9. <https://doi.org/10.7554/eLife.55646>
- 460 Afgan, E., Baker, D., Batut, B., van den Beek, M., Bouvier, D., Cech, M., Chilton, J., Clements, D.,  
461 Coraor, N., Grüning, B. A., Guerler, A., Hillman-Jackson, J., Hiltemann, S., Jalili, V., Rasche,  
462 H., Soranzo, N., Goecks, J., Taylor, J., Nekrutenko, A., & Blankenberg, D. (2018). The Galaxy  
463 platform for accessible, reproducible and collaborative biomedical analyses: 2018 update.  
464 *Nucleic Acids Research*, 46(W1), W537–W544.
- 465 Alabdullah, A. K., Borrill, P., Martin, A. C., Ramirez-Gonzalez, R. H., Hassani-Pak, K., Uauy, C.,  
466 Shaw, P., & Moore, G. (2019). A Co-Expression Network in Hexaploid Wheat Reveals Mostly  
467 Balanced Expression and Lack of Significant Gene Loss of Homeologous Meiotic Genes Upon  
468 Polyploidization. *Frontiers in Plant Science*, 10, 1325.
- 469 Ali, M., Hoyt, C. T., Domingo-Fernández, D., Lehmann, J., & Jabeen, H. (n.d.). *BioKEEN: A library*  
470 *for learning and evaluating biological knowledge graph embeddings*.  
471 <https://doi.org/10.1101/475202>
- 472 Alshahrani, M., & Hoehndorf, R. (2018). Semantic Disease Gene Embeddings (SmuDGE):  
473 phenotype-based disease gene prioritization without phenotypes. *Bioinformatics*, 34(17),  
474 i901–i907.
- 475 Atwell, S., Huang, Y. S., Vilhjálmsson, B. J., Willems, G., Horton, M., Li, Y., Meng, D., Platt, A.,  
476 Tarone, A. M., Hu, T. T., Jiang, R., Wayan Mulyati, N., Zhang, X., Amer, M. A., Baxter, I.,  
477 Brachi, B., Chory, J., Dean, C., Debieu, M., ... Nordborg, M. (2010). Genome-wide association  
478 study of 107 phenotypes in *Arabidopsis thaliana* inbred lines. *Nature*, 465(7298), 627.
- 479 Bahmani R, E. al. (n.d.). *The Density and Length of Root Hairs Are Enhanced in Response to*  
480 *Cadmium and Arsenic by Modulating Gene Expressions Involved in Fate Determination ...* -  
481 *PubMed - NCBI*. Retrieved September 3, 2018, from  
482 <https://www.ncbi.nlm.nih.gov/pubmed/27933081>
- 483 Biemann, C., Chris, B., Lachezar, K., Stefanie, R., & Karsten, W. (2016). Network Motifs Are a  
484 Powerful Tool for Semantic Distinction. In *Understanding Complex Systems* (pp. 83–105).
- 485 Bipei Zhang, A. S. (2017). TRANSPARENT TESTA GLABRA 1-Dependent Regulation of

- 486 Flavonoid Biosynthesis. *Plants*, 6(4). <https://doi.org/10.3390/plants6040065>
- 487 Blake, V. C., Birkett, C., Matthews, D. E., Hane, D. L., Bradbury, P., & Jannink, J.-L. (2016). The  
488 Triticeae Toolbox: Combining Phenotype and Genotype Data to Advance Small-Grains  
489 Breeding. *The Plant Genome*, 9(2). <https://doi.org/10.3835/plantgenome2014.12.0099>
- 490 Blake, V. C., Woodhouse, M. R., Lazo, G. R., Odell, S. G., Wight, C. P., Tinker, N. A., Wang, Y.,  
491 Gu, Y. Q., Birkett, C. L., Jannink, J.-L., Matthews, D. E., Hane, D. L., Michel, S. L., Yao, E., &  
492 Sen, T. Z. (2019). GrainGenes: centralized small grain resources and digital platform for  
493 geneticists and breeders. *Database: The Journal of Biological Databases and Curation*, 2019.  
494 <https://doi.org/10.1093/database/baz065>
- 495 Bolser, D. M., Staines, D. M., Perry, E., & Kersey, P. J. (2017). Ensembl Plants: Integrating Tools  
496 for Visualizing, Mining, and Analyzing Plant Genomic Data. *Methods in Molecular Biology* ,  
497 1533, 1–31.
- 498 Boyle, E. A., Li, Y. I., & Pritchard, J. K. (2017). An Expanded View of Complex Traits: From  
499 Polygenic to Omnigenic. *Cell*, 169(7), 1177–1186.
- 500 Brandizi, M., Singh, A., Rawlings, C., & Hassani-Pak, K. (2018a). Towards FAIRer Biological  
501 Knowledge Networks Using a Hybrid Linked Data and Graph Database Approach. *Journal of*  
502 *Integrative Bioinformatics*. <https://doi.org/10.1515/jib-2018-0023>
- 503 Brandizi, M., Singh, A., Rawlings, C., & Hassani-Pak, K. (2018b). Getting the best of Linked Data  
504 and Property Graphs: rdf2neo and the KnetMiner Use Case. *SWAT4LS Proceedings*.  
505 <https://doi.org/10.6084/m9.figshare.7314323.v1>
- 506 Carvalho-Silva, D., Pierleoni, A., Pignatelli, M., Ong, C., Fumis, L., Karamanis, N., Carmona, M.,  
507 Faulconbridge, A., Hercules, A., McAuley, E., Miranda, A., Peat, G., Spitzer, M., Barrett, J.,  
508 Hulcoop, D. G., Papa, E., Koscielny, G., & Dunham, I. (2019). Open Targets Platform: new  
509 developments and updates two years on. *Nucleic Acids Research*, 47(D1), D1056–D1065.
- 510 De Bie, T. (2013). Subjective Interestingness in Exploratory Data Mining. In *Lecture Notes in*  
511 *Computer Science* (pp. 19–31).
- 512 De Bie, T., & Spyropoulou, E. (2013). A Theoretical Framework for Exploratory Data Mining:  
513 Recent Insights and Challenges Ahead. In *Lecture Notes in Computer Science* (pp. 612–616).
- 514 Ehrlinger, L., & Wöß, W. (2016). Towards a Definition of Knowledge Graphs. *SEMANTiCS*

- 515 (Posters, Demos, SuCCESS), 48.
- 516 [https://www.researchgate.net/profile/Wolfram\\_Woess/publication/323316736\\_Towards\\_a\\_Defi](https://www.researchgate.net/profile/Wolfram_Woess/publication/323316736_Towards_a_Definition_of_Knowledge_Graphs/links/5a8d6e8f0f7e9b27c5b4b1c3/Towards-a-Definition-of-Knowledge-Graphs.pdf)
- 517 [nition\\_of\\_Knowledge\\_Graphs/links/5a8d6e8f0f7e9b27c5b4b1c3/Towards-a-Definition-of-](https://www.researchgate.net/profile/Wolfram_Woess/publication/323316736_Towards_a_Definition_of_Knowledge_Graphs/links/5a8d6e8f0f7e9b27c5b4b1c3/Towards-a-Definition-of-Knowledge-Graphs.pdf)
- 518 [Knowledge-Graphs.pdf](https://www.researchgate.net/profile/Wolfram_Woess/publication/323316736_Towards_a_Definition_of_Knowledge_Graphs/links/5a8d6e8f0f7e9b27c5b4b1c3/Towards-a-Definition-of-Knowledge-Graphs.pdf)
- 519 Fensel, D., Şimşek, U., Angele, K., Huaman, E., Kärle, E., Panasiuk, O., Toma, I., Umbrich, J., &
- 520 Wahler, A. (2020). Introduction: What Is a Knowledge Graph? In *Knowledge Graphs* (pp. 1–
- 521 10). Springer, Cham.
- 522 Fletcher, J. C. (2001). The ULTRAPETALA gene controls shoot and floral meristem size in
- 523 *Arabidopsis*. *Development*, 128(8), 1323–1333.
- 524 Fox, P., & Hendler, J. (2011). Changing the equation on scientific data visualization. *Science*,
- 525 331(6018), 705–708.
- 526 Garcia, L., Giraldo, O., Garcia, A., & Dumontier, M. (2017). Bioschemas: schema.org for the Life
- 527 Sciences. *Proceedings of SWAT4LS*. <http://ceur-ws.org/Vol-2042/paper33.pdf>
- 528 Hanley, S. J., & Karp, A. (2014). Genetic strategies for dissecting complex traits in biomass willows
- 529 (*Salix* spp.). *Tree Physiology*, 34(11), 1167–1180.
- 530 Harrington, S. A., Backhaus, A. E., Singh, A., & Hassani-Pak, K. (2019). Validation and
- 531 characterisation of a wheat GENIE3 network using an independent RNA-Seq dataset. *bioRxiv*.
- 532 <https://www.biorxiv.org/content/10.1101/684183v1.abstract>
- 533 Hassani-Pak, K., Castellote, M., Esch, M., Hindle, M., Lysenko, A., Taubert, J., & Rawlings, C.
- 534 (2016). Developing integrated crop knowledge networks to advance candidate gene
- 535 discovery. *Applied & Translational Genomics*, 11, 18–26.
- 536 Hassani-Pak, K., Legaie, R., Canevet, C., van den Berg, H. A., Moore, J. D., & Rawlings, C. J.
- 537 (2010). Enhancing data integration with text analysis to find proteins implicated in plant stress
- 538 response. *Journal of Integrative Bioinformatics*, 7(3). [https://doi.org/10.2390/biecoll-jib-2010-](https://doi.org/10.2390/biecoll-jib-2010-121)
- 539 121
- 540 Holmes, J. H. (2014). Knowledge Discovery in Biomedical Data: Theory and Methods. In *Methods*
- 541 *in Biomedical Informatics* (pp. 179–240).
- 542 Holzinger, A., & Jurisica, I. (2014). Knowledge Discovery and Data Mining in Biomedical
- 543 Informatics: The Future Is in Integrative, Interactive Machine Learning Solutions. In *Lecture*

- 544 *Notes in Computer Science* (pp. 1–18).
- 545 Isenberg, T., Isenberg, P., Chen, J., Sedlmair, M., & Möller, T. (2013). A Systematic Review on the  
546 Practice of Evaluating Visualization. *IEEE Transactions on Visualization and Computer*  
547 *Graphics*, 19(12), 2818–2827.
- 548 Kluyver, T., Ragan-Kelley, B., Pérez, F., Granger, B. E., Bussonnier, M., Frederic, J., Kelley, K.,  
549 Hamrick, J. B., Grout, J., Corlay, S., Ivanov, P., Avila, D., Abdalla, S., & Willing, C. (2016).  
550 *Jupyter Notebooks - a publishing format for reproducible computational workflows*.  
551 <https://doi.org/10.3233/978-1-61499-649-1-87>
- 552 Larry Peterson, R., & Farquhar, M. L. (1996). Root hairs: Specialized tubular cells extending root  
553 surfaces. *The Botanical Review; Interpreting Botanical Progress*, 62(1), 1–40.
- 554 Lee, B., Isenberg, P., Riche, N. H., & Carpendale, S. (2012). Beyond Mouse and Keyboard:  
555 Expanding Design Considerations for Information Visualization Interactions. *IEEE*  
556 *Transactions on Visualization and Computer Graphics*, 18(12), 2689–2698.
- 557 Messina, A., Fiannaca, A., La Paglia, L., La Rosa, M., & Urso, A. (2018). BioGraph: a web  
558 application and a graph database for querying and analyzing bioinformatics resources. *BMC*  
559 *Systems Biology*, 12(Suppl 5), 98.
- 560 Miller, J., Town, C., Stuerzlinger, W., & Provar, N. J. (2017). ePlant: visualizing and exploring  
561 multiple levels of data for hypothesis generation in plant biology. *The Plant*.  
562 <http://www.plantcell.org/content/29/8/1806.short>
- 563 Mohamed, S. K., Nováček, V., & Nounu, A. (2019). Discovering Protein Drug Targets Using  
564 Knowledge Graph Embeddings. *Bioinformatics* . <https://doi.org/10.1093/bioinformatics/btz600>
- 565 Mungall, C. J., McMurry, J. A., Köhler, S., Balhoff, J. P., Borromeo, C., Brush, M., Carbon, S.,  
566 Conlin, T., Dunn, N., Engelstad, M., Foster, E., Gouridine, J. P., Jacobsen, J. O. B., Keith, D.,  
567 Laraway, B., Lewis, S. E., NguyenXuan, J., Shefchek, K., Vasilevsky, N., ... Haendel, M. A.  
568 (2017). The Monarch Initiative: an integrative data and analytic platform connecting  
569 phenotypes to genotypes across species. *Nucleic Acids Research*, 45(D1), D712–D722.
- 570 Nakamura S, E. al. (n.d.). *A wheat homolog of MOTHER OF FT AND TFL1 acts in the regulation*  
571 *of germination*. - *PubMed - NCBI*. Retrieved August 30, 2018, from  
572 <https://www.ncbi.nlm.nih.gov/pubmed/21896881>

- 573 Nilsson-Ehle, H. (1914). *Zur Kenntnis der mit der keimungsphysiologie des weizens in*  
574 *zusammenhang stehenden inneren faktoren.*
- 575 Pavelin, K., Cham, J. A., de Matos, P., Brooksbank, C., Cameron, G., & Steinbeck, C. (2012).  
576 Bioinformatics meets user-centred design: a perspective. *PLoS Computational Biology*, 8(7),  
577 e1002554.
- 578 Polderman, T. J. C., Benyamin, B., de Leeuw, C. A., Sullivan, P. F., van Bochoven, A., Visscher,  
579 P. M., & Posthuma, D. (2015). Meta-analysis of the heritability of human traits based on fifty  
580 years of twin studies. *Nature Genetics*, 47(7), 702–709.
- 581 Russell-Rose, T., Chamberlain, J., & Azzopardi, L. (2018). Information retrieval in the workplace: A  
582 comparison of professional search practices. *Information Processing & Management*, 54(6),  
583 1042–1057.
- 584 Sacchi, L., & Holmes, J. H. (2016). Progress in Biomedical Knowledge Discovery: A 25-year  
585 Retrospective. *Yearbook of Medical Informatics, Suppl 1*, S117–S129.
- 586 Salton, G., & Yang, C. S. (1973). *On the Specification of Term Values in Automatic Indexing.*  
587 *Journal of Documentation.*
- 588 Sears, E. R. (1944). Cytogenetic Studies with Polyploid Species of Wheat. II. Additional  
589 Chromosomal Aberrations in *Triticum Vulgare*. *Genetics*, 29(3), 232.
- 590 Sheth, A., Padhee, S., & Gyrard, A. (2019). Knowledge Graphs and Knowledge Networks: The  
591 Story in Brief. *IEEE Internet Computing*, 23(4), 67–75.
- 592 Singh, A., Rawlings, C. J., & Hassani-Pak, K. (2018). KnetMaps: a BioJS component to visualize  
593 biological knowledge networks. *F1000Research*, 7, 1651.
- 594 Sonah, H., O'Donoghue, L., Cober, E., Rajcan, I., & Belzile, F. (2015). Identification of loci  
595 governing eight agronomic traits using a GBS-GWAS approach and validation by QTL  
596 mapping in soya bean. In *Plant Biotechnology Journal* (Vol. 13, Issue 2, pp. 211–221).  
597 <https://doi.org/10.1111/pbi.12249>
- 598 Stephens, Z. D., Lee, S. Y., Faghri, F., Campbell, R. H., Zhai, C., Efron, M. J., Iyer, R., Schatz, M.  
599 C., Sinha, S., & Robinson, G. E. (2015). Big Data: Astronomical or Genomical? *PLoS Biology*,  
600 13(7), e1002195.
- 601 Sweis, B. M., Abram, S. V., Schmidt, B. J., Seeland, K. D., MacDonald, A. W., 3rd, Thomas, M. J.,

602 & Redish, A. D. (2018). Sensitivity to “sunk costs” in mice, rats, and humans. *Science*,  
603 361(6398), 178–181.

604 The International Wheat Genome Sequencing Consortium (IWGSC), IWGSC RefSeq principal  
605 investigators:, Appels, R., Eversole, K., Feuillet, C., Keller, B., Rogers, J., Stein, N., IWGSC  
606 whole-genome assembly principal investigators:, Pozniak, C. J., Choulet, F., Distelfeld, A.,  
607 Poland, J., Ronen, G., Sharpe, A. G., Whole-genome sequencing and assembly:, Pozniak, C.,  
608 Barad, O., Baruch, K., ... Manuscript writing team: (2018). Shifting the limits in wheat research  
609 and breeding using a fully annotated reference genome. *Science*, 361(6403), eaar7191.

610 Xiaoxue, L., Xuesong, B., Longhe, W., Bingyuan, R., Shuhan, L., & Lin, L. (2019). Review and  
611 Trend Analysis of Knowledge Graphs for Crop Pest and Diseases. *IEEE Access*, 7, 62251–  
612 62264.

613 Xi, W., Liu, C., Hou, X., & Yu, H. (2010). MOTHER OF FT AND TFL1 regulates seed germination  
614 through a negative feedback loop modulating ABA signaling in Arabidopsis. *The Plant Cell*,  
615 22(6), 1733–1748.

616 Yoon, B.-H., Kim, S.-K., & Kim, S.-Y. (2017). Use of Graph Database for the Integration of  
617 Heterogeneous Biological Data. *Genomics & Informatics*, 15(1), 19–27.

618 Zong Y, E. al. (n.d.). *Allelic Variation and Transcriptional Isoforms of Wheat TaMYC1 Gene*  
619 *Regulating Anthocyanin Synthesis in Pericarp*. - PubMed - NCBI. Retrieved August 30, 2018,  
620 from <https://www.ncbi.nlm.nih.gov/pubmed/28983311>

621
